# Supplementary material for: The HIPPO Transducer YAP and Its Targets CTGF and Cyr61 Drive a Paracrine Signalling in Cold Atmospheric Plasma-Mediated Wound Healing
Source: Hindawi journal article supplement (doi:10.1155/2020/4910280), 2020-02-13

Fig S1: Summary of monoculture and co-culture

| Monoculture                                                                        | GM Fbs            | HaCaT             | Time of the assay | Plate type               |
|------------------------------------------------------------------------------------|-------------------|-------------------|-------------------|--------------------------|
| In vitro scratch assay                                                             | $6 \times 10^4$   | $6 \times 10^4$   | 24 hr             | 96 well Image lock plate |
| In vitro scratch assay (HaCaT monoculture stimulated with CTGF, Cyr61 or GM Fb CM) | -                 | $4 \times 10^4$   | 24hr              | 96 well Image lock plate |
| Metabolic Activity assay                                                           | $2.1 \times 10^4$ | $2.1 \times 10^4$ | 3hr, 24hr         | 96 well plate            |
| Harvest of GM Fb CM                                                                | $0.1 \times 10^6$ | -                 | 18hr              | 24 well plate            |

| Co-culture               | GM Fbs            | HaCaT             | Time of the assay | Plate type               |
|--------------------------|-------------------|-------------------|-------------------|--------------------------|
| In vitro scratch assay   | $2 \times 10^4$   | $4 \times 10^4$   | 24 hr             | 96 well Image lock plate |
| Metabolic Activity assay | $0.7 \times 10^4$ | $1.4 \times 10^4$ | 3hr, 24hr         | 96 well plate            |

FigS2: Forward and reverse primer sequences used in Real time PCR for YAP, Cyr61 and CTGF

|           |                        |
|-----------|------------------------|
| YAP fwd   | TAGCCCTGCGTAGCCAGTTA   |
| YAP rev   | TCATGCTTAGTCCACTGTCTGT |
| Cyr61 fwd | GGTCAAAGTTACCGGGCAGT   |
| Cyr61 rev | GGAGGCATCGAATCCCAGC    |
| CTGF fwd  | CAGCATGGACGTTTCGTCTG   |
| CTGF rev  | AACCACGGTTTGGTCCTTGG   |

Fig S3: Amplex Red assay to monitor  $\text{H}_2\text{O}_2$  production

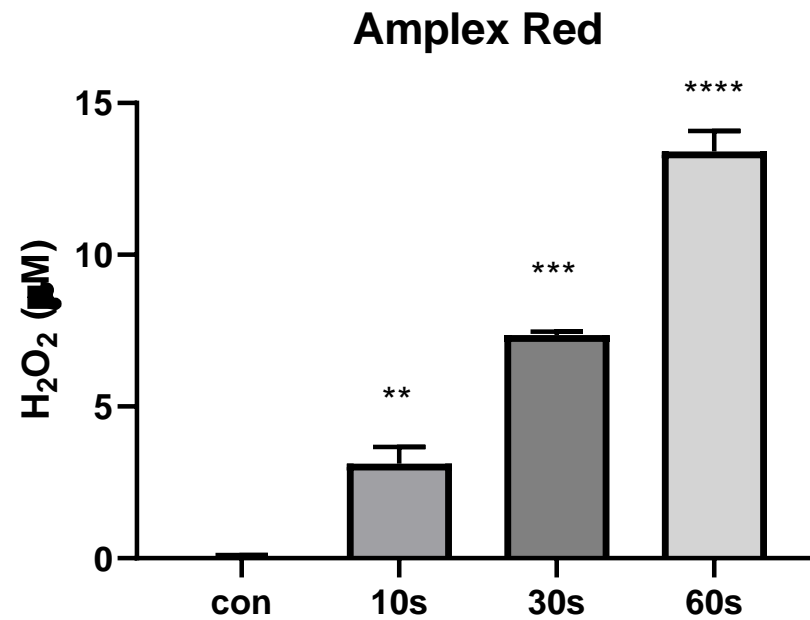

FigS4: Wound healing images at times 0, 12 and 24 hour in untreated and CAP treated co-culture

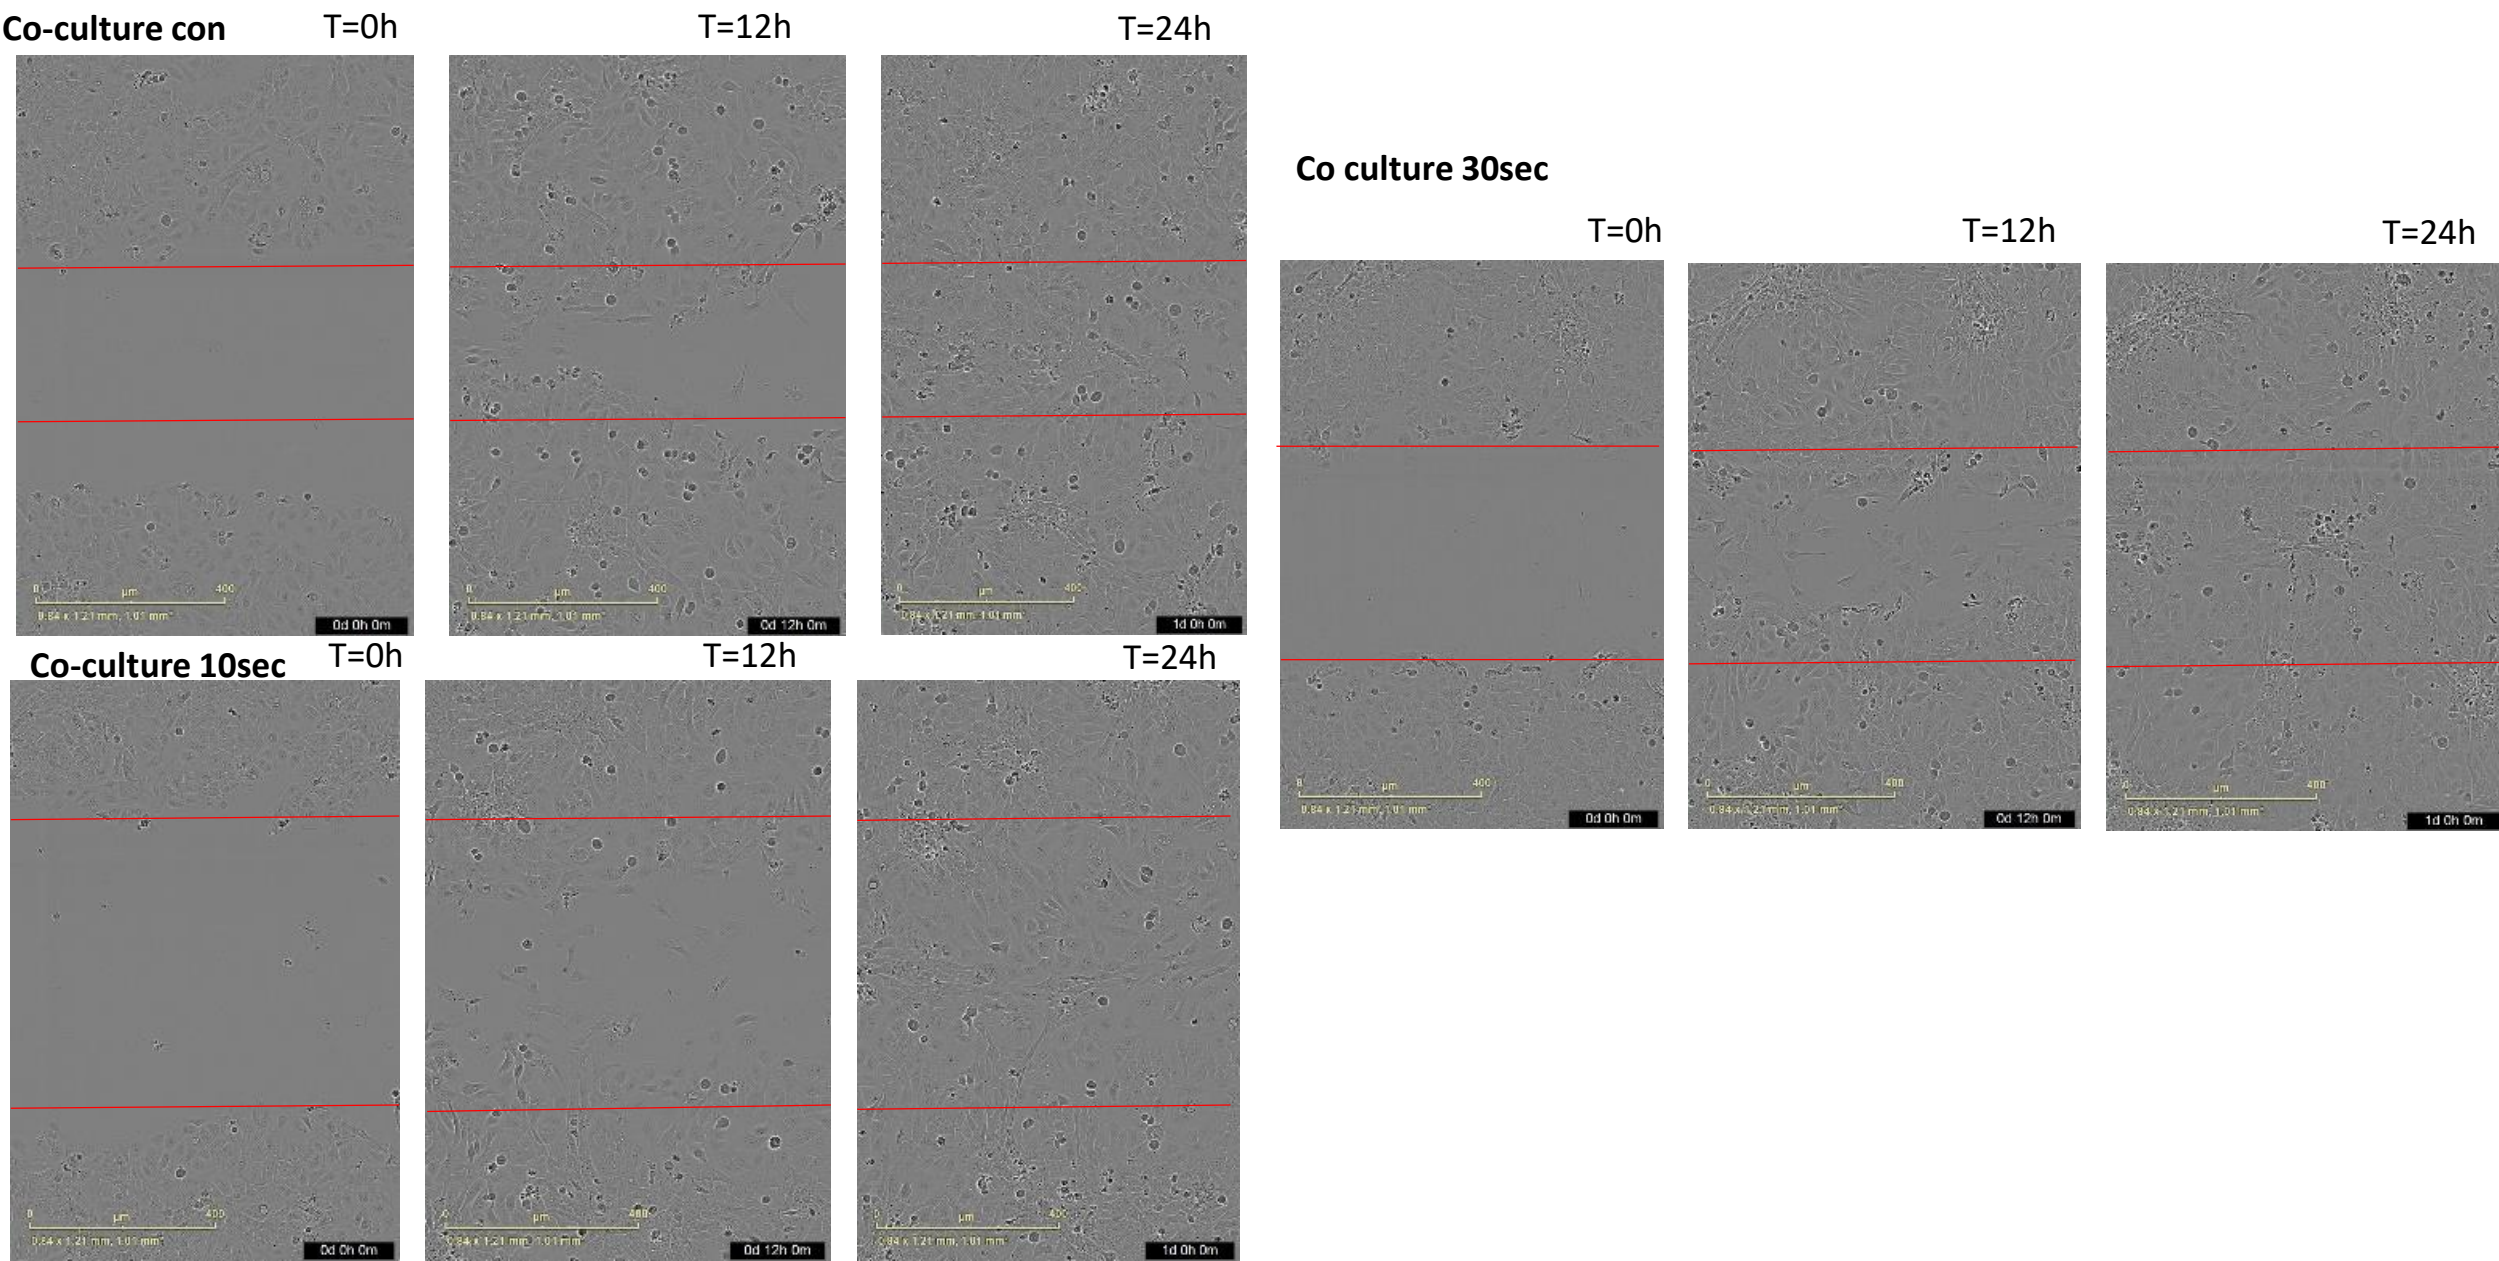



FigS5: Wound healing images at times 0, 12 and 24 hour in untreated and CAP treated HaCaT cells

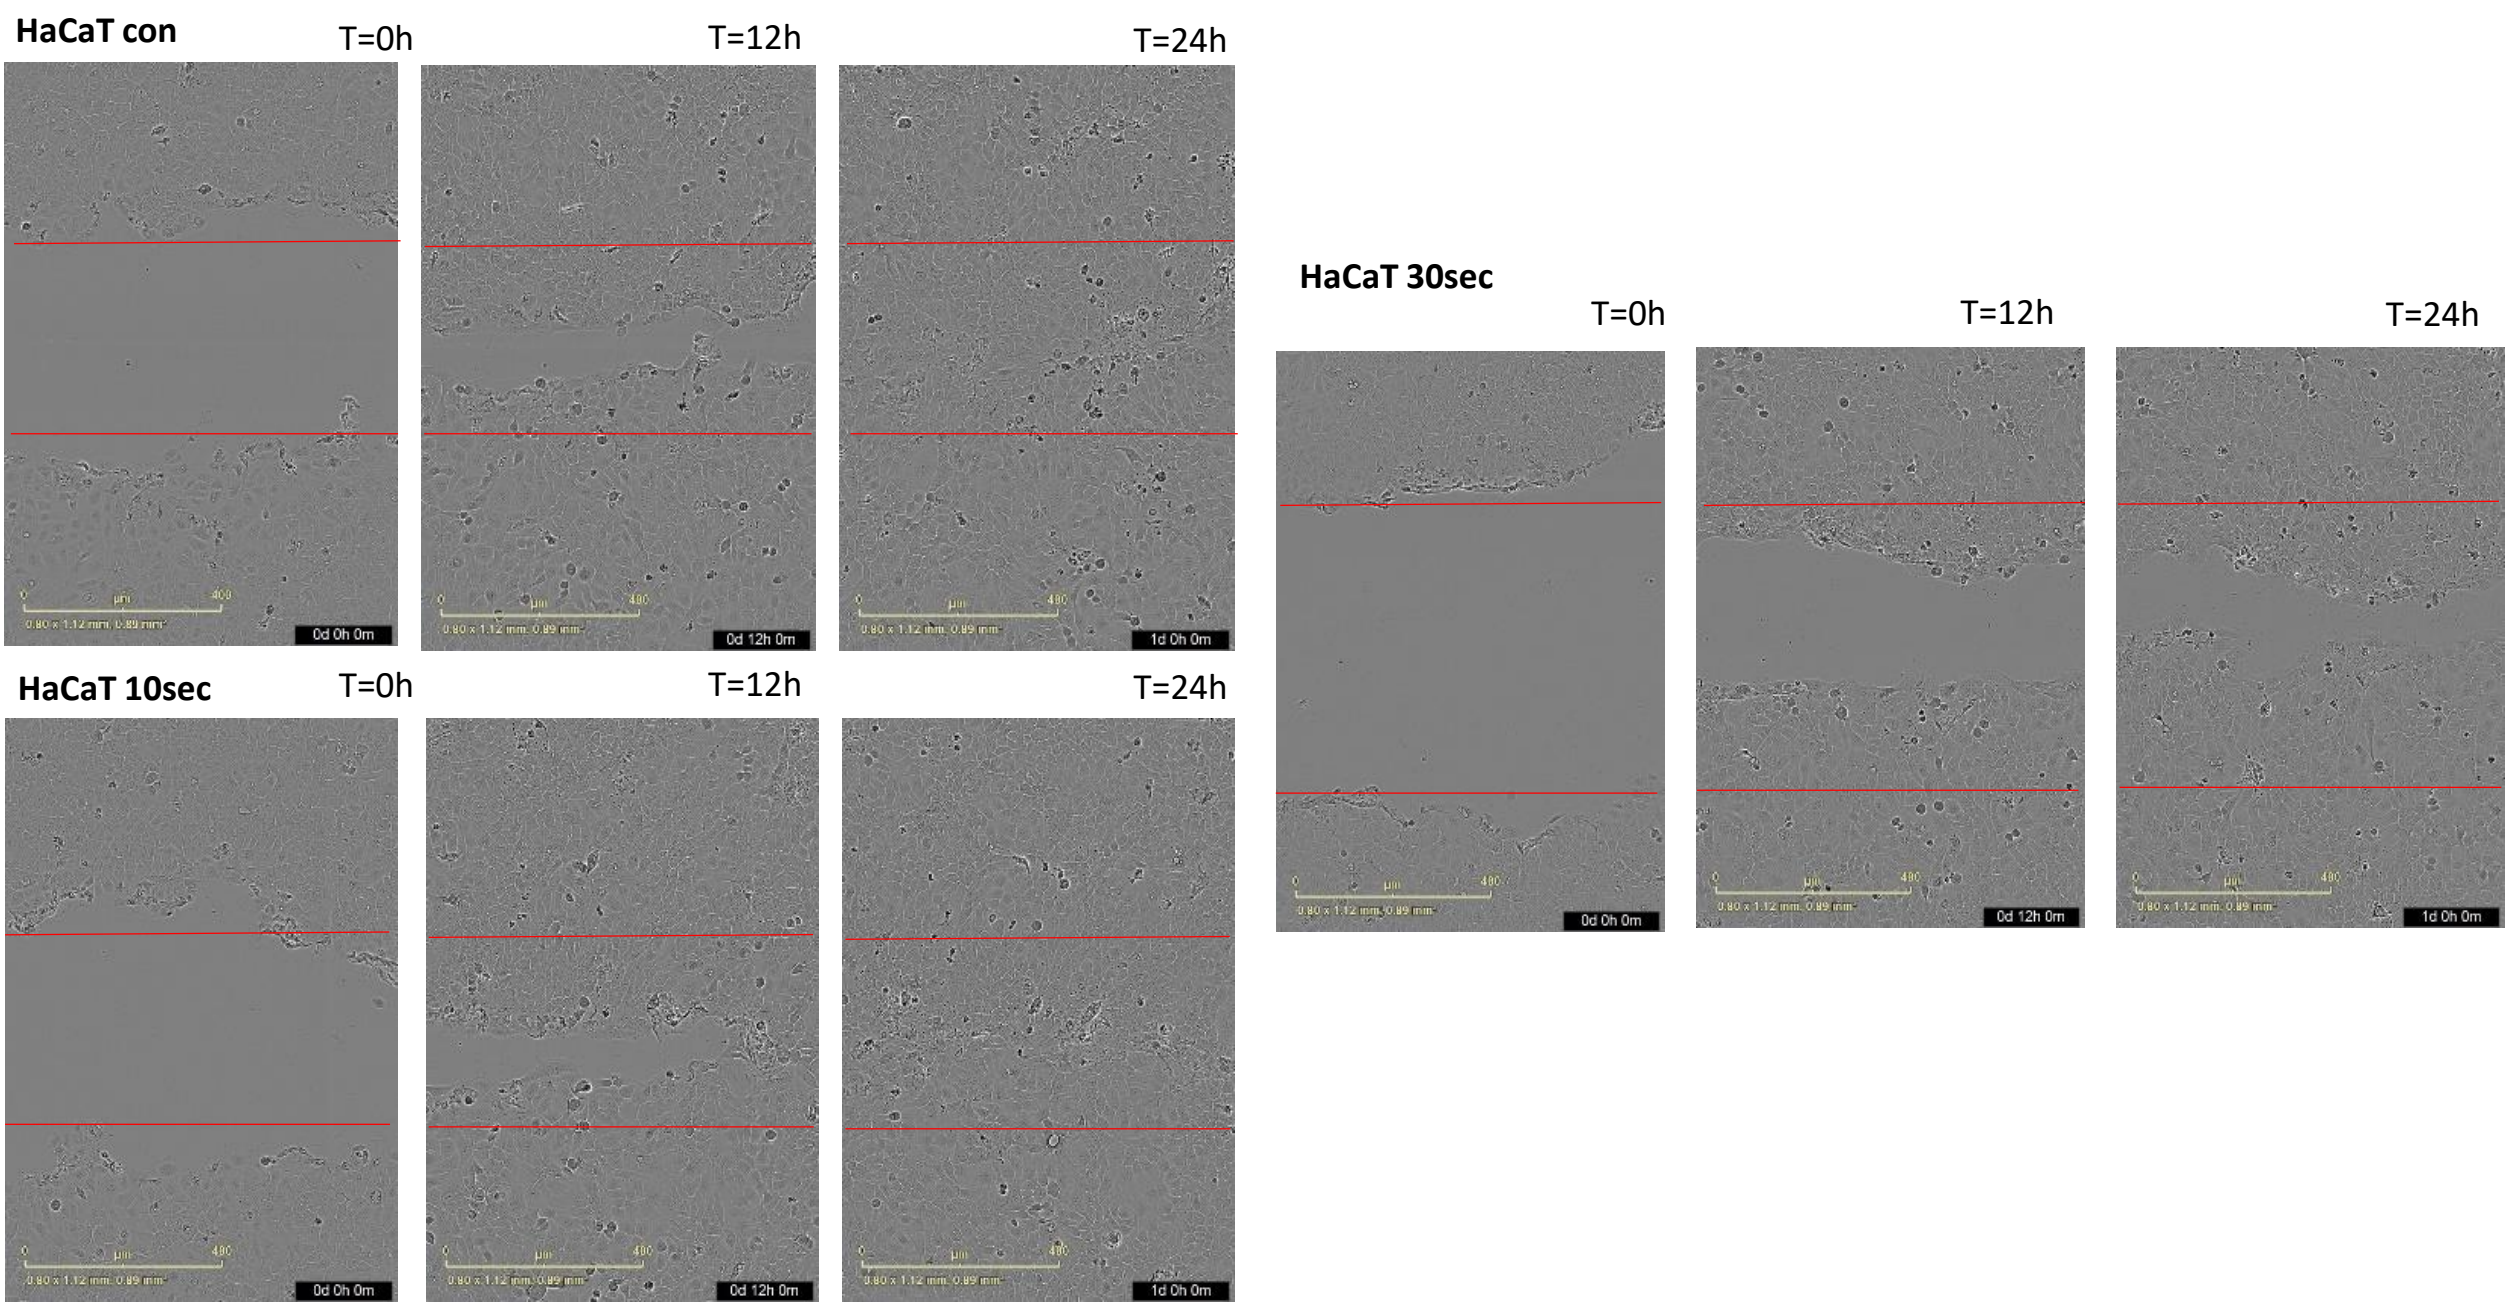



FigS6: Wound healing images at times 0, 12 and 24 hour in untreated and CAP treated GM Fbs

GM Fb con

T=0h

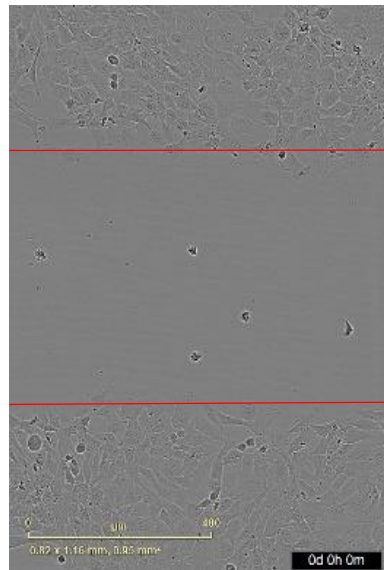

T=12h

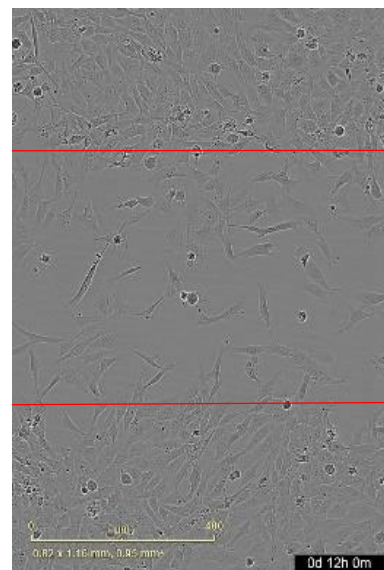

T=24h

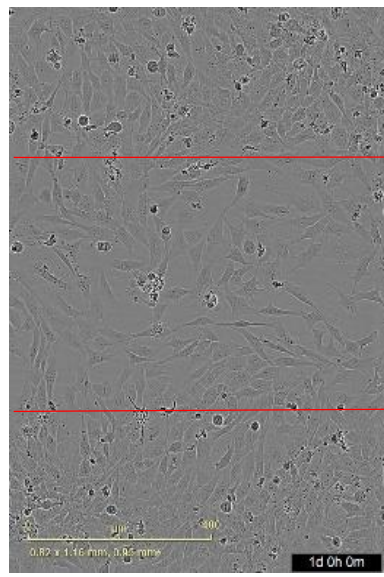

GM Fb 10sec

T=0h

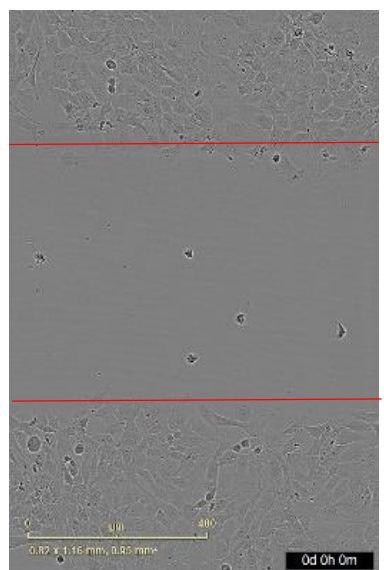

T=12h

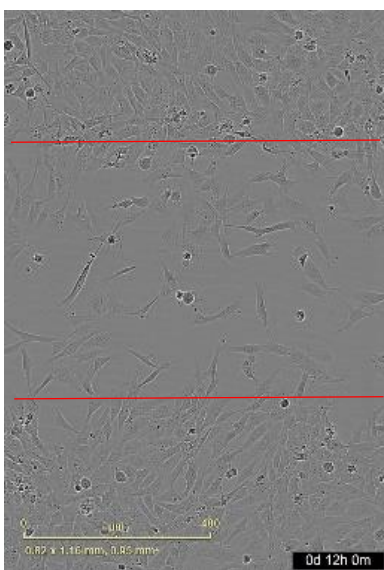

T=24h

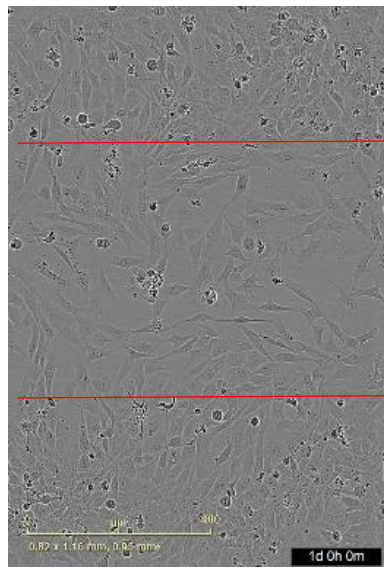

GM Fb 30sec

T=0h

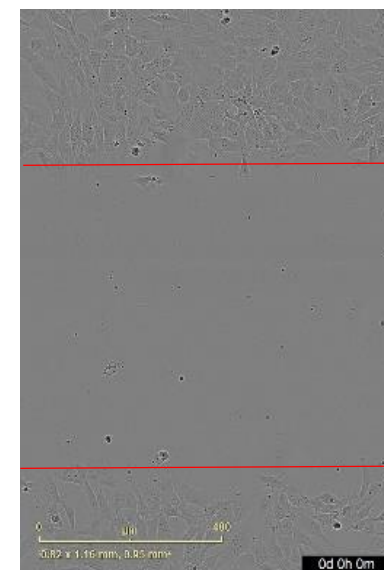

T=12h

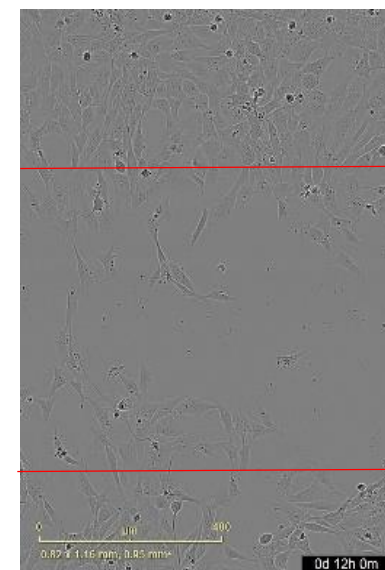

T=24h

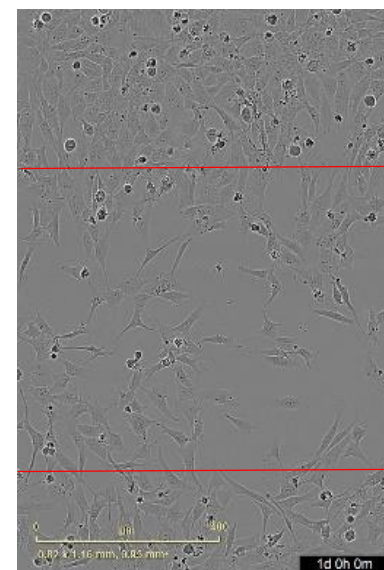

Supplement: f1 [file 4910280.f1.pdf]
